# Supplementary material for: Global, cell non-autonomous gene regulation drives individual lifespan among isogenic C. elegans
Source: eLife journal article supplement (doi:10.7554/elife.65026), 2021-02-01

*Plet-7::GFP*

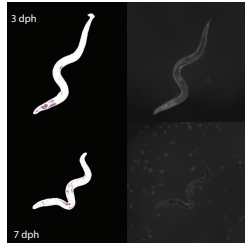

*Plin-4::GFP*

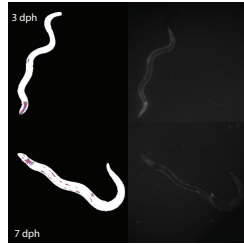

*Pmir-1::GFP*

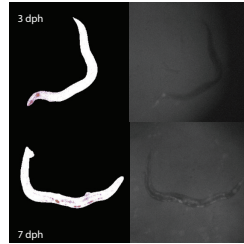

*Pmir-47::GFP*

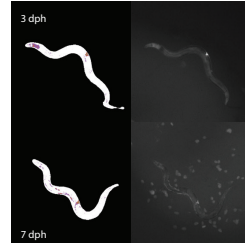

*Pmir-51::GFP*

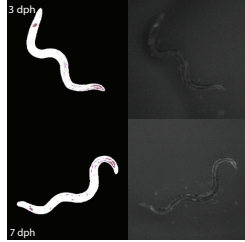

*Pmir-59::GFP*

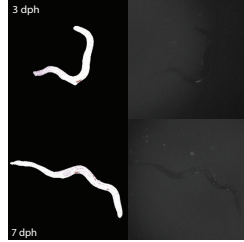

*Pmir-60::GFP*

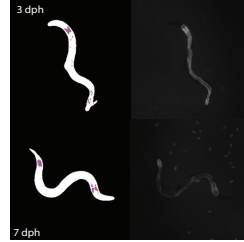

*Pmir-63::GFP*

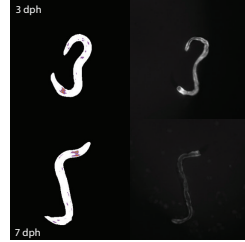

*Pmir-79::GFP*

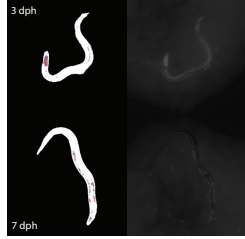

Pmir-84::GFP

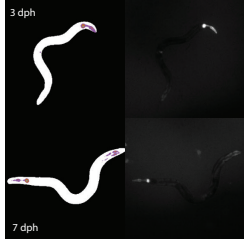

*Pmir-85::GFP*

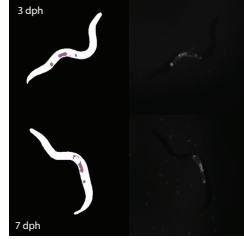

*Pmir-90::GFP*

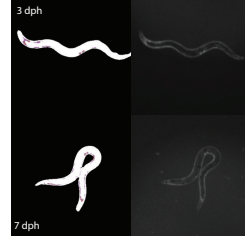

*Pmir-228::GFP*

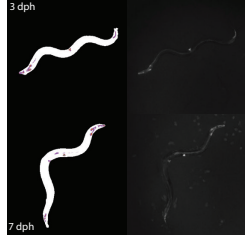

*Pmir-240-786::GFP*

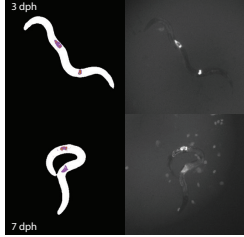

*Pmir-241::GFP*

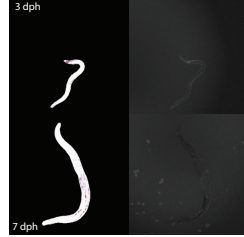

*Pmir-242::GFP*

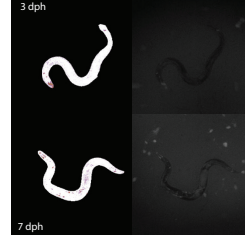

*Pmir-243::GFP*

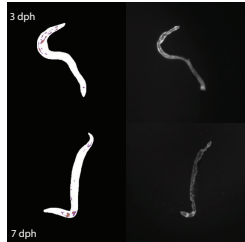

*Pmir-246::GFP*

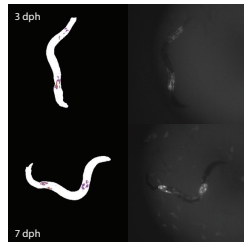

*Pmir-360::GFP*

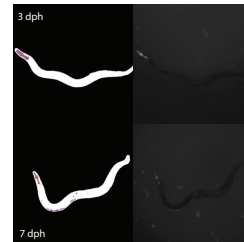

*Pmir-788::GFP*

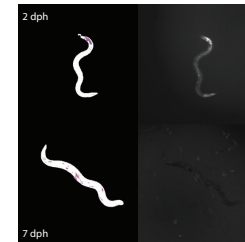

*Pmir-793::GFP*

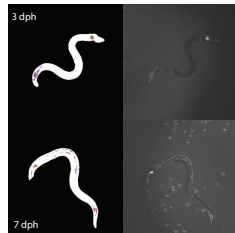

*Pmir-794::GFP*

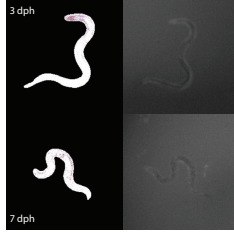

Supplement: supp [file elife_poa_e65026_Figure_1_figure_supplement_1.pdf › elife_poa_e65026_Figure_1_figure_supplement_1.pdf]
