# Supplementary material for: Global, cell non-autonomous gene regulation drives individual lifespan among isogenic C. elegans
Source: eLife journal article supplement (doi:10.7554/elife.65026), 2021-02-01

### *Pmir-60::GFP* lifespan-predictive value over time

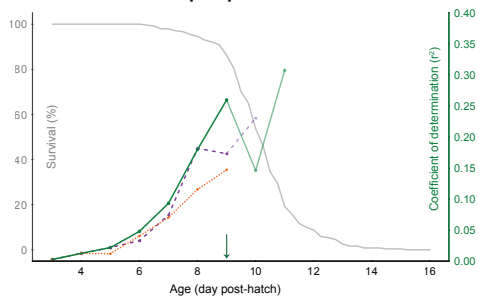

### *Pmir-243::GFP* lifespan-predictive value over time

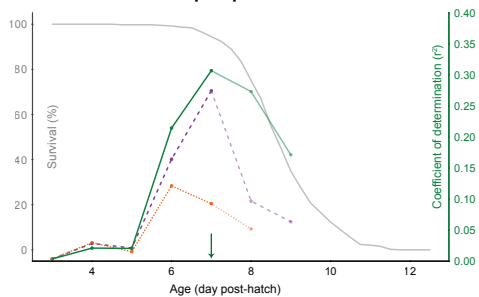

### ***Pmir-47::GFP* lifespan-predictive value over time**

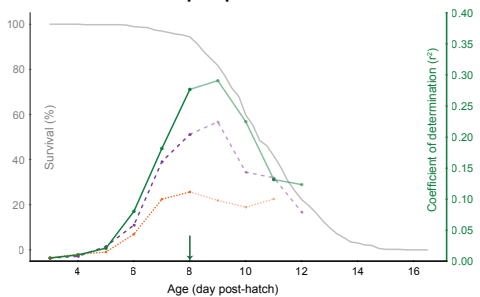

### ***Pmir-240-786::GFP* lifespan-predictive value over time**

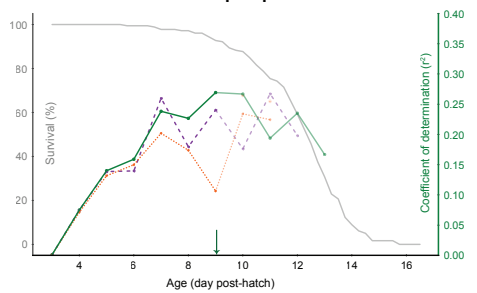

### ***Pmir-90::GFP* lifespan-predictive value over time**

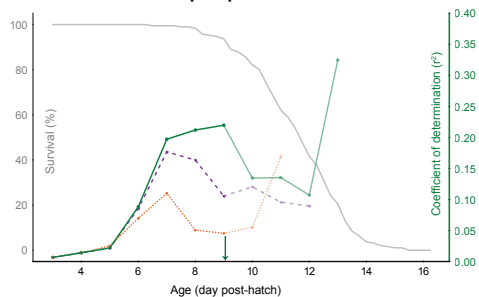

### ***Pmir-793::GFP* lifespan-predictive value over time**

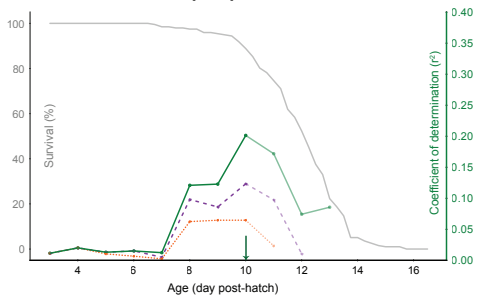

### Plin-4::GFP lifespan-predictive value over time

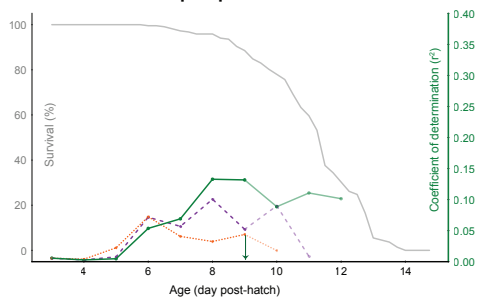

### ***Pmir-246::GFP* lifespan-predictive value over time**

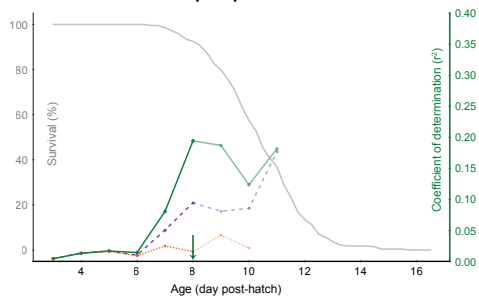

### *Pmir-85::GFP* lifespan-predictive value over time

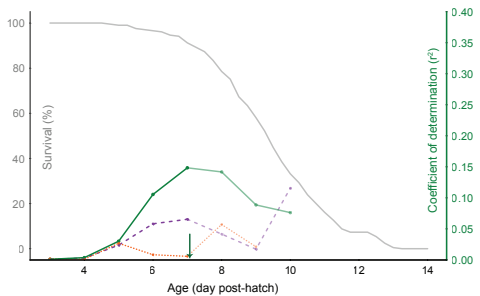

### *Pmir-228::GFP* lifespan-predictive value over time

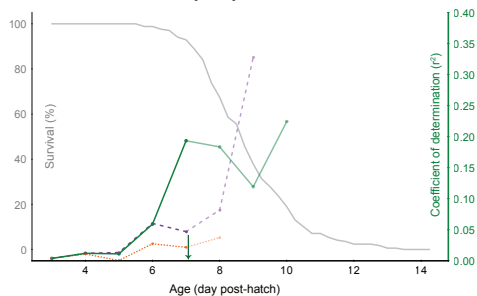

Supplement: supp [file elife_poa_e65026_Figure_3_figure_supplement_1.pdf › elife_poa_e65026_Figure_3_figure_supplement_1.pdf]
