# Supplementary material for: Global, cell non-autonomous gene regulation drives individual lifespan among isogenic C. elegans
Source: eLife journal article supplement (doi:10.7554/elife.65026), 2021-02-01

***Pmir-60::GFP* lifespan-predictive value over time**

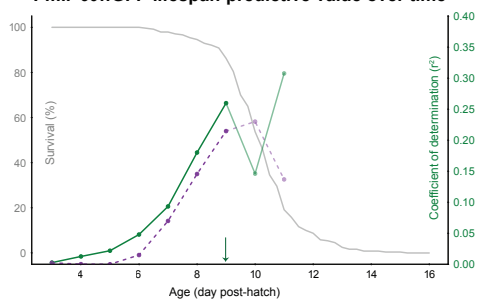

***Pmir-243::GFP* lifespan-predictive value over time**

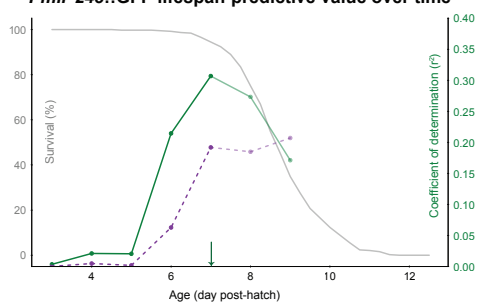

***Pmir-47::GFP* lifespan-predictive value over time**

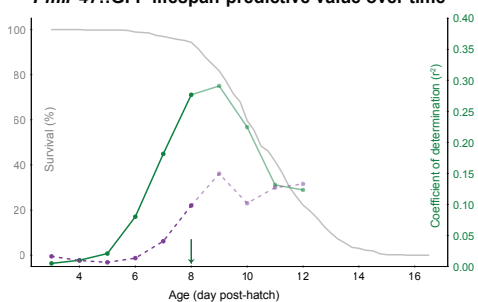

***Pmir-240-786::GFP* lifespan-predictive value over time**

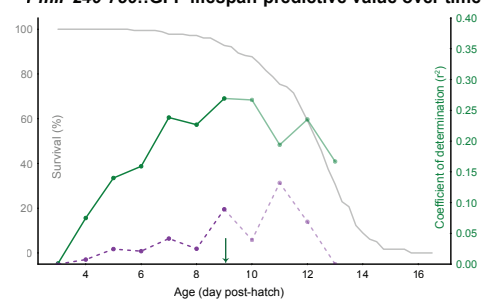

***Pmir-90::GFP* lifespan-predictive value over time**

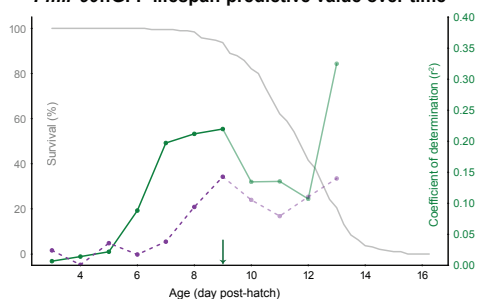

***Pmir-793::GFP* lifespan-predictive value over time**

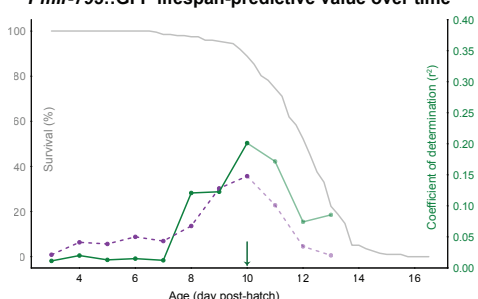

***Plin-4::GFP* lifespan-predictive value over time**

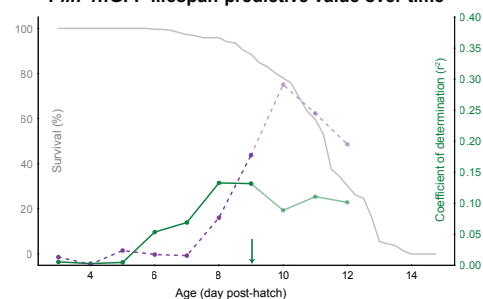

***Pmir-246::GFP* lifespan-predictive value over time**

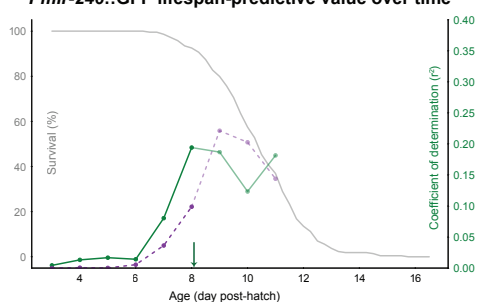

***Pmir-85::GFP* lifespan-predictive value over time**

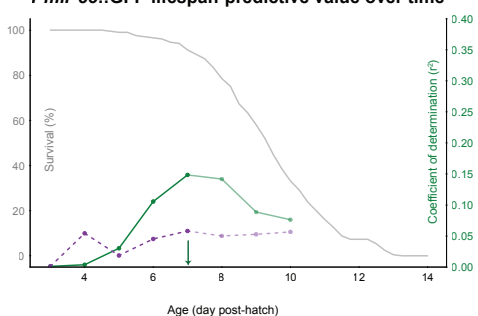

***Pmir-228::GFP* lifespan-predictive value over time**

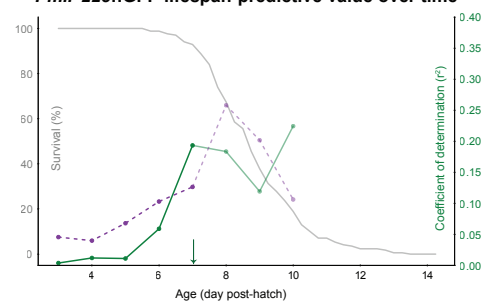

Supplement: supp [file elife_poa_e65026_Figure_3_figure_supplement_2.pdf › elife_poa_e65026_Figure_3_figure_supplement_2.pdf]
