# Supplementary figures and images for: Global, cell non-autonomous gene regulation drives individual lifespan among isogenic C. elegans
Source: eLife journal article supplement (doi:10.7554/elife.65026), 2021-02-01

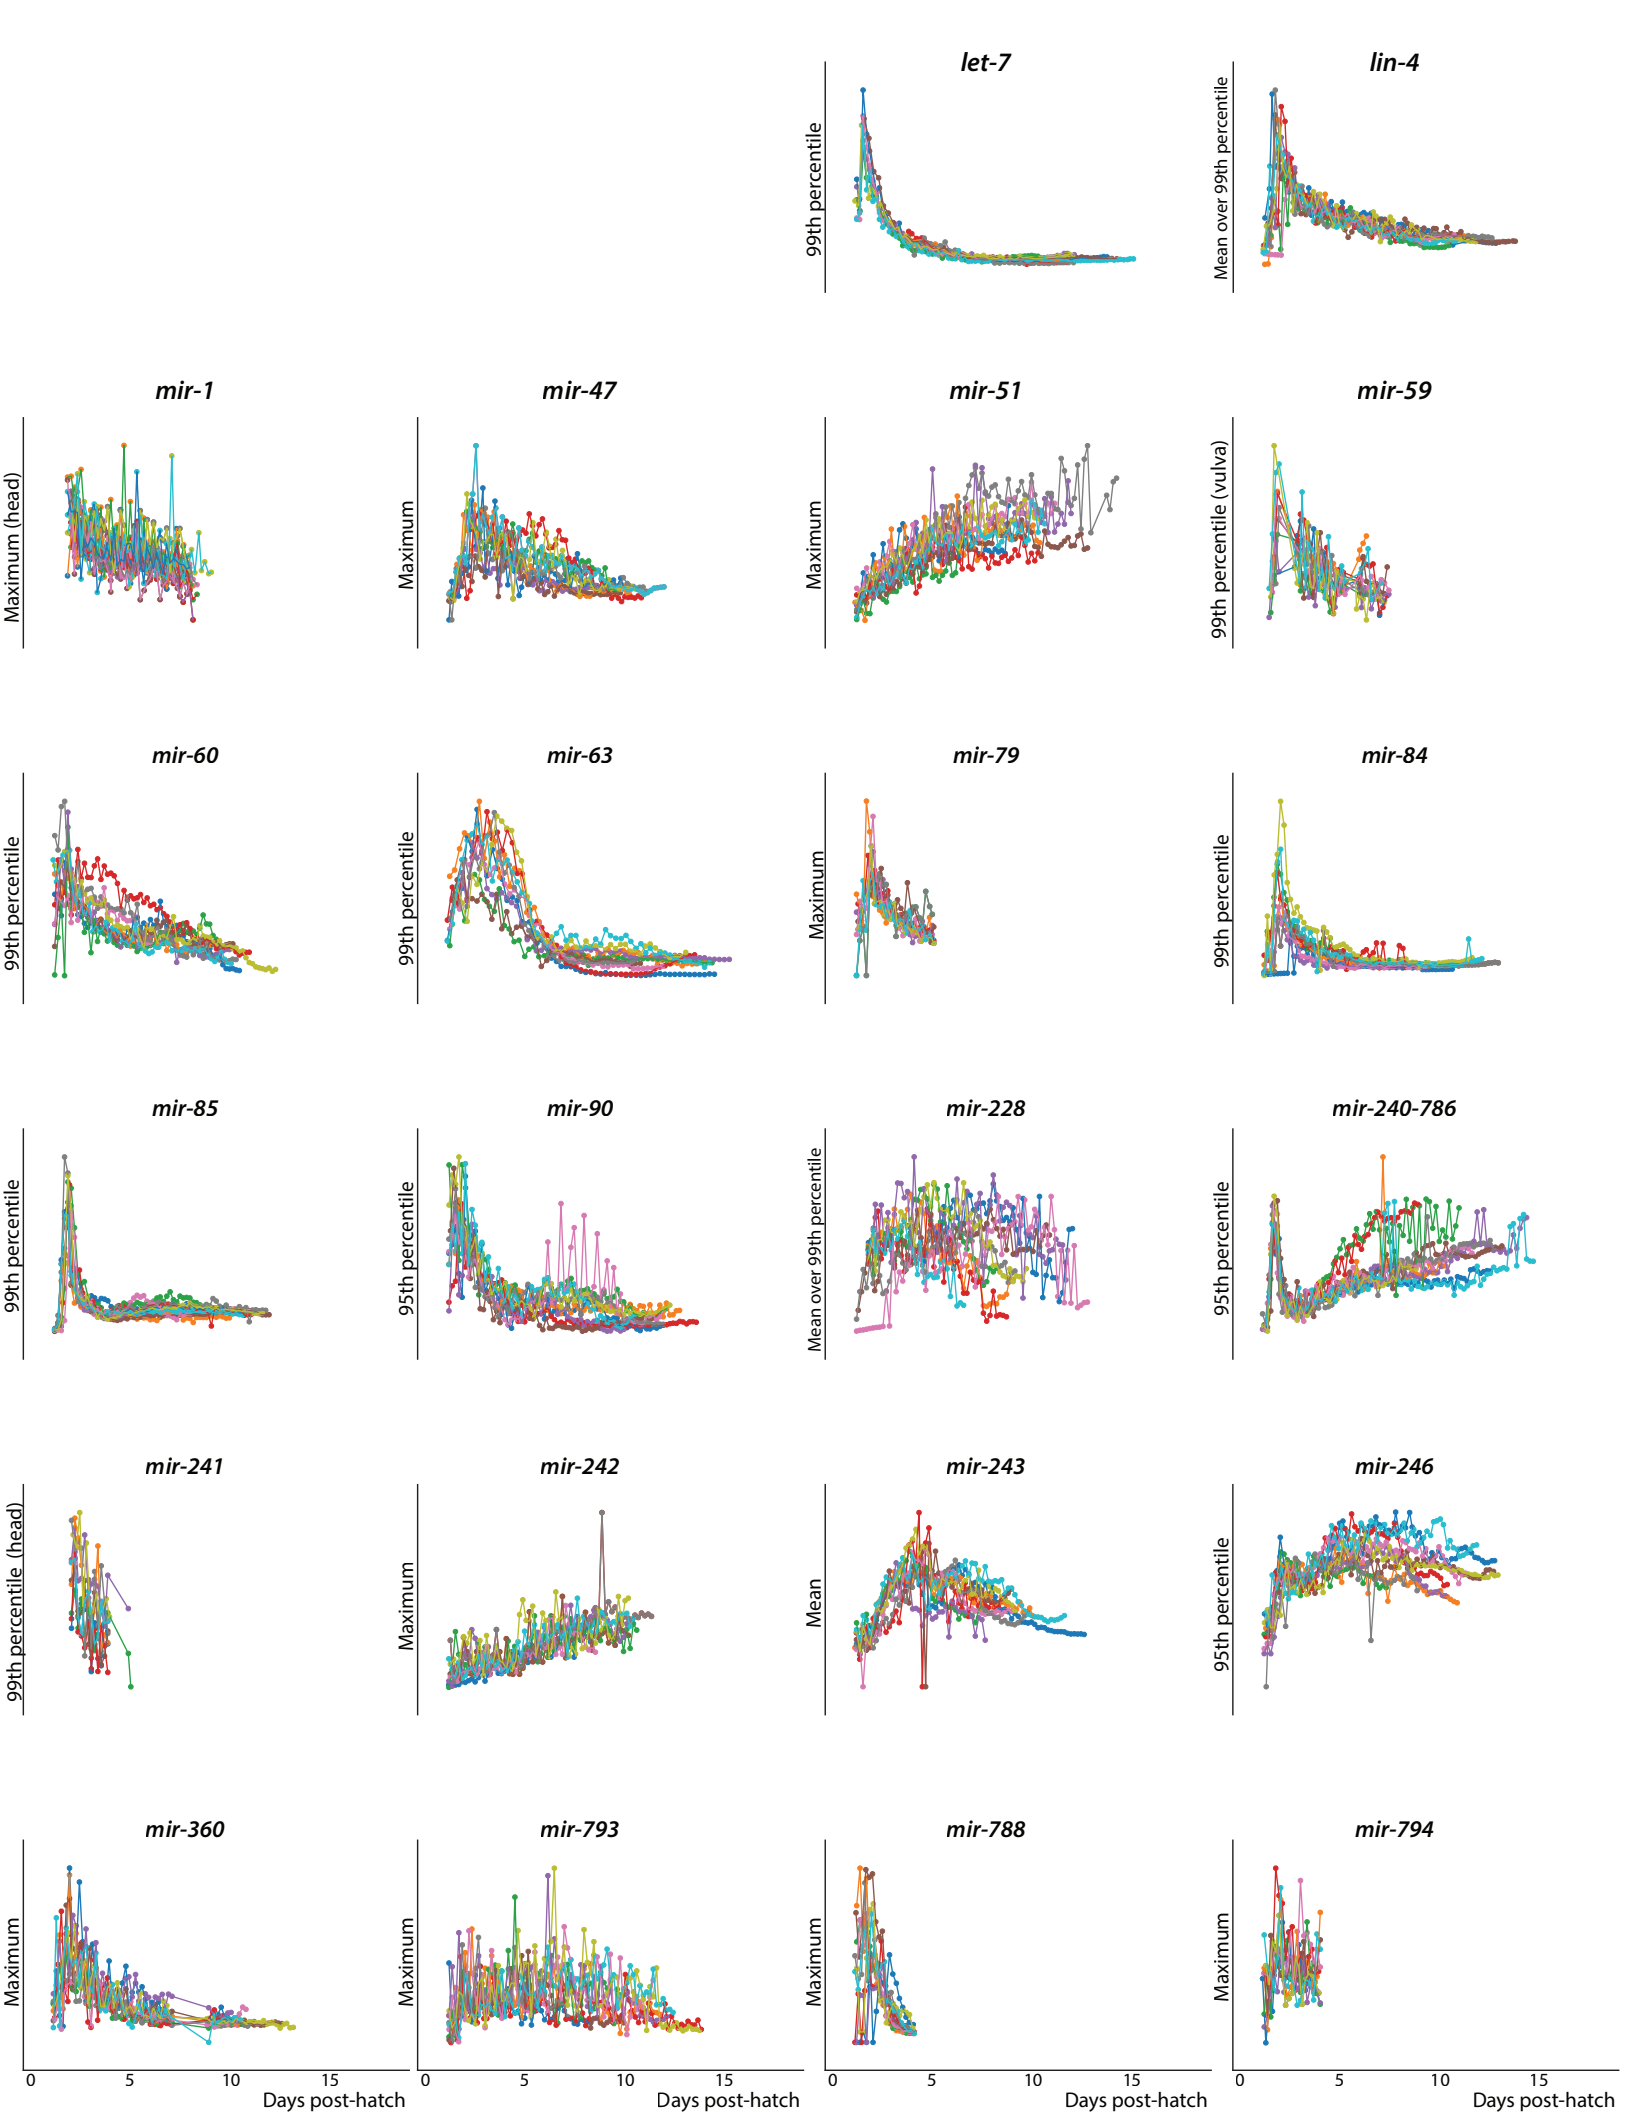

Supplement: supp [file elife_poa_e65026_Figure_1_figure_supplement_2.pdf › elife_poa_e65026_Figure_1_figure_supplement_2.pdf]

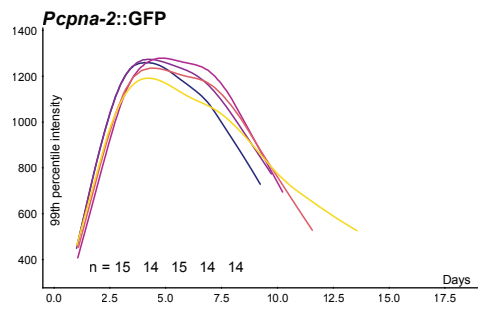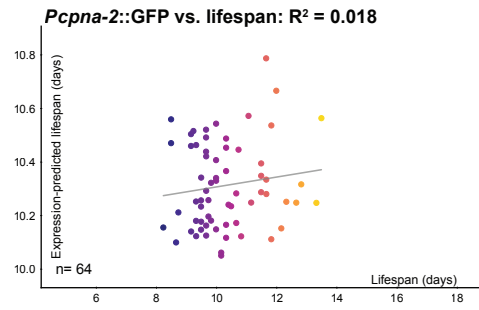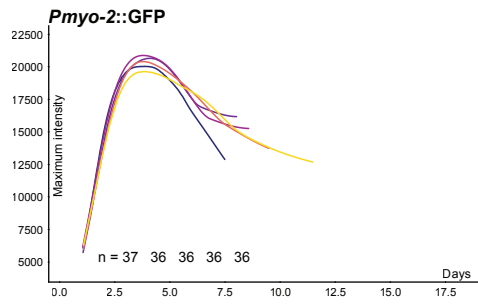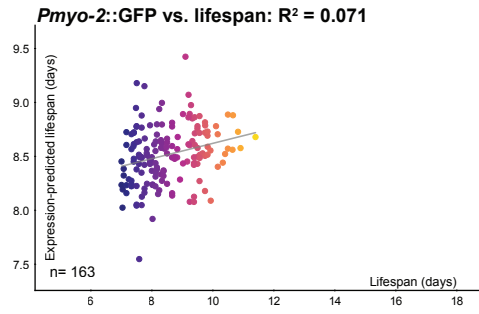

Supplement: supp [file elife_poa_e65026_Figure_2_figure_supplement_1.pdf › elife_poa_e65026_Figure_2_figure_supplement_1.pdf]

**a**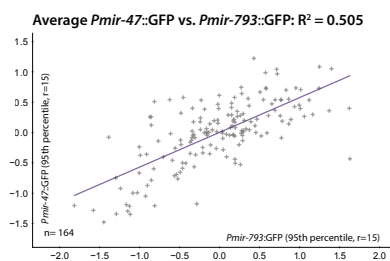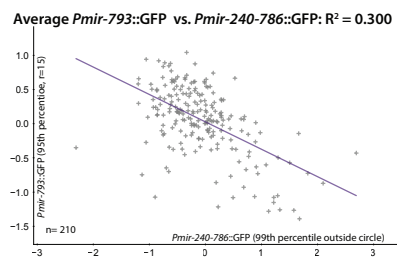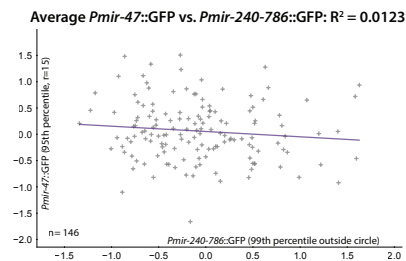**b**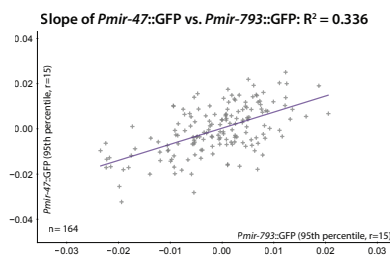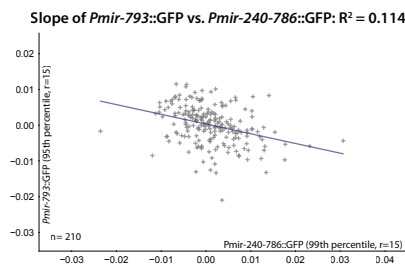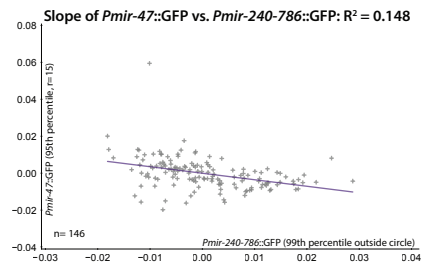

Supplement: supp [file elife_poa_e65026_Figure_6_figure_supplement_1.pdf › elife_poa_e65026_Figure_6_figure_supplement_1.pdf]
